1 **Volatile hydrogen cyanide released by *Pseudomonas aeruginosa* provides a**  
2 **competitive advantage over *Staphylococcus aureus* in biofilm and *in vivo* lung**  
3 **environments**

4  
5  
6 Sylvie LÉTOFFÉ<sup>1</sup>, Yongzheng WU<sup>2</sup>, Sophie E DARCH<sup>3</sup>, Christophe  
7 BELOIN<sup>1</sup>, Marvin WHITELEY<sup>4</sup>, Lhousseine TOUQUI<sup>5,6</sup> and Jean-Marc  
8 GHIGO<sup>1</sup>

9  
10 <sup>1</sup> Institut Pasteur, Université de Paris, CNRS UMR 6047, Genetics of Biofilms Laboratory,  
11 75015 Paris, France.

12  
13 <sup>2</sup> Institut Pasteur, Université de Paris, CNRS UMR3691, Cellular Biology of Microbial  
14 Infection Laboratory, 75015 Paris, France.

15  
16 <sup>3</sup> Department of Molecular Medicine, University of South Florida, 12901 Bruce B. Downs  
17 Boulevard, Tampa, Florida, 33612, United States.

18  
19 <sup>4</sup> School of Biological Sciences, Georgia Institute of Technology, Atlanta, Georgia, USA.

20  
21 <sup>5</sup> Institut Pasteur, Université de Paris, Mucoviscidose et Bronchopathies Chroniques, 75015  
22 Paris, France.

23  
24 <sup>6</sup> Centre de Recherche Saint-Antoine, CRSA, Sorbonne Université, Inserm, 75012 Paris,  
25 France.

26  
27  
28 **Corresponding author:** Jean-Marc Ghigo ([jmghigo@pasteur.fr](mailto:jmghigo@pasteur.fr))

29  
30 **Running title:** *Pseudomonas-Staphylococcus* HCN-mediated competition.

31  
32  
33 **Keywords:** Volatile compounds; *Staphylococcus aureus*; *Pseudomonas aeruginosa*;  
34 bacterial co-infection; hydrogen cyanide

35  
36

1 **ABSTRACT**

2  
3 Diverse bacterial volatile compounds alter bacterial stress responses and physiology, but  
4 their contribution to population dynamics in polymicrobial communities is not well  
5 known. In this study, we showed that airborne volatile hydrogen cyanide (HCN) produced  
6 by a wide range of *Pseudomonas aeruginosa* clinical strains leads to at-a-distance  
7 inhibition of the growth of a wide array of *Staphylococcus aureus* strains. We determined  
8 that low oxygen level environments not only enhance *P. aeruginosa* HCN production but  
9 also increase *S. aureus* sensitivity to HCN, which impacts *P. aeruginosa*-*S. aureus*  
10 competition in microaerobic *in vitro* mixed biofilms as well as in an *in vitro* cystic fibrosis  
11 lung sputum medium. Consistently, we demonstrated that production of HCN provides a  
12 competitive advantage to *P. aeruginosa* in a mouse model of airways co-infected by *P.*  
13 *aeruginosa* and *S. aureus*. Our study therefore demonstrates that *P. aeruginosa* HCN  
14 contributes to local and distant airborne competition against *S. aureus* and potentially  
15 other HCN-sensitive bacteria in contexts relevant to cystic fibrosis and other  
16 polymicrobial infectious diseases.

17  
18 **IMPORTANCE**

19  
20 Airborne volatile compounds produced by bacteria are often only considered as attractive  
21 or repulsive scents, but they also directly contribute to bacterial physiology. Here we  
22 showed that volatile hydrogen cyanide (HCN) released by a wide range of *Pseudomonas*  
23 *aeruginosa* clinical strains inhibits *Staphylococcus aureus* growth in low oxygen *in vitro*  
24 biofilms or aggregates and *in vivo* lung environments. These results are of  
25 pathophysiological relevance, since lungs of cystic fibrosis patients are known to present  
26 microaerophilic areas and to be commonly associated with the presence of *S. aureus* and  
27 *P. aeruginosa* in polymicrobial communities. Our study therefore provides insights into  
28 how a bacterial volatile compound can contribute to the exclusion of *S. aureus* and other  
29 HCN-sensitive competitors from *P. aeruginosa* ecological niches. It opens new  
30 perspectives for the management or monitoring of *P. aeruginosa* infections in lower lung  
31 airway infections and other polymicrobial disease contexts.

32

## 1 INTRODUCTION

2

3 Bacteria release a wide diversity of volatile molecules contributing to cross-kingdom  
4 interactions with fungi, plants and animal (1, 2). Bacteria volatile compounds also play a  
5 role in bacterial physiology by altering stress responses, antibiotic resistance, biofilm  
6 formation and expression of virulence factors. Although these interactions likely  
7 contribute to bacterial population dynamics, relatively little is known regarding  
8 interactions mediated by volatile compounds in polymicrobial communities (2-8). Cystic  
9 Fibrosis (CF) is a common genetic disease in which the patients' airways are often  
10 colonized by multiple bacterial pathogens, including *Pseudomonas aeruginosa* and  
11 *Staphylococcus aureus*, that are frequently found in association in the same lung lobes  
12 (9-15). Whereas *S. aureus* usually colonizes the airways first during CF infection, it is  
13 later outcompeted and replaced by *P. aeruginosa* (12, 16-20).

14

15 Several *P. aeruginosa* extra-cellular factors inhibiting *S. aureus* growth could contribute  
16 to this colonization shift during CF infection, including siderophores, 4-hydroxy-2-  
17 heptylquinoline-*N*-oxide (HQNO), proteases, RedOx and surface active compounds (19,  
18 21-26). By contrast, less is known about how competitive interactions of *P. aeruginosa*  
19 are mediated via the production of volatile compounds and their impact on the dynamics  
20 of coinfections with *S. aureus* (27-29).

21

22 It has long been recognized that *P. aeruginosa* metabolism produces volatile hydrogen  
23 cyanide (HCN) that can rapidly diffuse into the environment (30, 31). HCN is an inhibitor  
24 of cytochrome c oxidases and other metallo-enzymes that bind iron, leading to the  
25 inhibition of the respiratory chain (30). HCN production is restricted to *Pseudomonas*,  
26 *Chromobacterium*, *Rhizobium* and several cyanobacterial species that avoid auto-  
27 intoxication by expressing HCN-insensitive cytochrome oxidase (31). *P. aeruginosa*  
28 HCN is produced by the oxidative decarboxylation of glycine mediated by membrane-  
29 bound cyanide synthases encoded by the *hcnABC* operon (32-34). *hcnABC* expression is  
30 maximal between 34 °C and 37 °C and transcriptionally up-regulated in microaerophilic  
31 conditions or by high bacterial cell density conditions (31, 35). Consistently, HCN  
32 production by *P. aeruginosa* is regulated by the anaerobic regulator Anr, and the LasR  
33 and RhIR quorum sensing regulators (36). HCN is therefore produced in environmental

1 conditions leading to the induction of *P. aeruginosa* virulence factors, including the  
2 synthesis of alginate a constituent of *P. aeruginosa* biofilms matrix and a major virulence  
3 factor in the lungs of CF patients (37-39).  
4 Considering that HCN was shown to poison a wide range of eukaryotic organisms (2, 40-  
5 42), it was hypothesized that cyanogenesis could also poison HCN-sensitive bacteria in a  
6 range of polymicrobial niches (26, 28, 30, 31, 39, 43, 44). However, whereas *P.*  
7 *aeruginosa* HCN was shown to inhibit the growth of a wide range of Staphylococci,  
8 including *S. aureus* (45), the direct contribution of HCN to *P. aeruginosa* dominance over  
9 *S. aureus* within polymicrobial niches such as biofilms or infected lungs is still unclear.  
10  
11 Here we showed that exposure to airborne HCN produced by *P. aeruginosa* inhibits *S.*  
12 *aureus* growth and influences the dynamics of *P. aeruginosa*-*S. aureus* interactions in *in*  
13 *vitro* mixed biofilms. We determined that HCN production is widespread among *P.*  
14 *aeruginosa* clinical strains and particularly active in low oxygen (microaerobic)  
15 conditions against a representative panel of *S. aureus* isolates. We also demonstrated that  
16 *P. aeruginosa* HCN impairs *S. aureus* growth in an *in vitro* CF lung sputum model as  
17 well as in a mouse model of airway co-infection by *P. aeruginosa* and *S. aureus*. Our  
18 study therefore shows that volatile HCN provides *P. aeruginosa* with a competitive  
19 advantage in local and at-a-distance airborne competitions against *S. aureus* and  
20 potentially other HCN-sensitive bacteria in context relevant to CF and other  
21 polymicrobial infectious diseases.  
22

## 1 RESULTS

2

### 3 **Production of volatile hydrogen cyanide by *Pseudomonas aeruginosa* leads to** 4 **airborne inhibition of *Staphylococcus aureus* growth**

5 To determine whether HCN released by *P. aeruginosa* could inhibit the growth of *S.*  
6 *aureus*, we first tested its HCN production by PAO1, a commonly used strain of *P.*  
7 *aeruginosa* isolated from a wound infection (46). Using a semi-quantitative HCN  
8 detection method based on the intensity of blue color produced upon HCN reaction with  
9 copper(II) ethylacetoacetate and 4,4'-methylenebis- (N,N-dimethylaniline) (47)  
10 (Supplementary Fig. S1), we detected an HCN signal emitted from WT *P. aeruginosa*  
11 PAO1 grown in LB, which increased upon glycine supplementation (Fig.1A). By contrast,  
12 no HCN signal could be detected from a  $\Delta hcnB$  mutant, which lacks HCN production  
13 (Fig.1A). We then exposed *S. aureus* to *P. aeruginosa* PAO1 volatile compounds in the  
14 set-up described in the supplementary Fig. S1. Whereas exposure to *P. aeruginosa* PAO1  
15 cultures modestly reduced *S. aureus* MW2 growth, the aerial exposure to culture  
16 supplemented with glycine led to a 100-1000-fold growth inhibition dependent on *hcnB*  
17 (Fig.1B). Moreover, we observed that a *S. aureus* MW2 *srrAB* mutant lacking the SrrAB  
18 global regulator of the transition from aerobic to anaerobic respiration displayed an  
19 increased sensitivity to HCN (Supplementary Fig. S2) (48). Finally, preventing HCN  
20 release by placing a parafilm seal on the emitting plate containing *P. aeruginosa* or *P.*  
21 *aeruginosa*  $\Delta hcnB$  culture supplemented with glycine did not lead to any growth defect,  
22 confirming the contribution of volatile HCN to *S. aureus* MW2 growth inhibition  
23 (Fig.1B).

24

### 25 **Production of biogenic HCN is widespread among *Pseudomonas aeruginosa* clinical** 26 **strains and active against diverse *S. aureus* isolates**

27 To determine whether HCN production is a widespread *P. aeruginosa* property, we  
28 exposed the HCN-sensitive *S. aureus* *srrAB* mutant to a panel of laboratory and clinical  
29 *P. aeruginosa* strains, many of them isolated from airway infections (Table 1). We  
30 showed that, despite variations, all tested strains aerially inhibited *S. aureus* *srrAB* in  
31 aerobic conditions, even in the absence of glycine (Supplementary Fig. S3A). Moreover,  
32 *P. aeruginosa* strains that led to a minimal reduction of *S. aureus* growth showed a strong  
33 growth inhibition phenotype when grown in the presence of glycine, indicative of an

1 increase in HCN production (Supplementary Fig. S3B). In addition, we also showed that  
2 the production of HCN by *P. aeruginosa* PAO1 in the presence of glycine inhibited the  
3 growth of a wide panel of distinct pathogenic *S. aureus* strains (Supplementary Fig. S4),  
4 confirming HCN-mediated growth inhibition at distance over a broad range of *S. aureus*  
5 strains.

6

### 7 **Microaerobia enhances *P. aeruginosa* HCN production while increasing *S. aureus*** 8 **sensitivity to HCN**

9 *P. aeruginosa* HCN production is regulated by quorum sensing (36). Consistently, we  
10 observed an increase of the HCN signal during the transition from exponential to  
11 stationary phase, at culture densities  $OD_{600} > 2$  (Fig. 2A). Compared to aerobic conditions,  
12 we also observed that the *P. aeruginosa* HCN signal was enhanced in microaerobic  
13 conditions (0.4-0.8% O<sub>2</sub>) (Fig. 2BD) (33). Moreover, in these microaerobic conditions, *S.*  
14 *aureus* MW2 was more sensitive to *P. aeruginosa* PAO1 HCN than when grown in  
15 aerobic conditions (Fig. 2CE). These results suggest that microaerobic conditions not  
16 only lead to higher HCN production in *P. aeruginosa* PAO, but also increased *S. aureus*  
17 MW2 sensitivity to HCN.

18

### 19 **Production of biogenic HCN impairs *S. aureus* growth in *in vitro* mixed biofilms**

20 Our results suggested that HCN production could contribute to the dynamics of *P.*  
21 *aeruginosa*-*S. aureus* competition. Considering that microaerobic conditions prevail  
22 within multi-species biofilms (49), we hypothesized that *P. aeruginosa* HCN production  
23 in biofilms could impact *S. aureus* growth dynamics in mixed *P. aeruginosa* / *S. aureus*  
24 biofilms. To test this *in vitro*, we co-inoculated continuous-flow biofilm microfermenters  
25 with *P. aeruginosa* PAO1 WT (HCN+) and or  $\Delta hcnB$  (HCN-) mutant at a 1:1 ratio with  
26 three different *S. aureus* strains, including HG001, or Xen36 and MW2. While all strains  
27 displayed similar individual biofilm-forming capacities (Fig. 3A), the *P. aeruginosa* and  
28 *S. aureus* proportions in the resulting two-species biofilms formed after 48h showed that  
29 all tested *S. aureus* strains formed less biofilm biomass, as measured by CFU count, when  
30 mixed with WT *P. aeruginosa* than with the HCN-deficient mutant (Fig. 3B). Taken  
31 together, these results indicate that the production of *P. aeruginosa* biogenic HCN  
32 impairs growth and outcompete *S. aureus* in mixed biofilms.

1 **Production of biogenic HCN provides a competitive advantage to *P. aeruginosa* over**  
2 ***S. aureus* in CF-relevant conditions**

3 To test whether production of HCN could provide *P. aeruginosa* with a competitive  
4 advantage over *S. aureus* in CF-relevant conditions, we first used the synthetic CF sputum  
5 (SCFM2) medium, designed to recapitulate human CF environments (50). We inoculated  
6 this medium with red fluorescent *S. aureus* LACdsr<sub>fp</sub> alone or in 1:1 mix ratio with *P.*  
7 *aeruginosa* PAO1<sub>gfp</sub> WT (HCN+) or its  $\Delta hcnB$  (HCN-) mutant. The comparison of the  
8 respective *S. aureus* and *P. aeruginosa* spatial organization revealed a strong reduction  
9 of *S. aureus* biomass development (Fig. 4A) and aggregate abundance when co-  
10 inoculated with WT *P. aeruginosa* (Fig. 4B top), in contrast to the opposite increase of *S.*  
11 *aureus* development in presence of the *P. aeruginosa*  $\Delta hcnB$  mutant (Fig. 4B bottom).

12 To further test the *in vivo* impact of HCN production on *S. aureus*/*P. aeruginosa* mixed  
13 community dynamics in the microaerophilic lung airways, we performed an *in vivo*  
14 competition in mice, in which lungs were intratracheally co-inoculated with *S. aureus*  
15 Xen36 strain and either *P. aeruginosa* PAO1 WT or  $\Delta hcnB$ . Mice lungs infected  
16 individually show that *P. aeruginosa* colonizes better than *S. aureus* Xen36 (Fig. 4C left)  
17 The comparison of the number of CFUs extracted from mice lungs co-inoculated in a 2:1  
18 mixed ratio (*P. aeruginosa* : *S. aureus*) showed a 2 log decrease of *S. aureus* Xen36 in  
19 presence of WT PAO1 (HCN+) as compared to *S. aureus* growth in presence of the PAO1  
20  $\Delta hcnB$  mutant (HCN-) (Fig.4C). Taken together, our results demonstrate that HCN  
21 production by *P. aeruginosa* reduces *S. aureus* colonization in co-infected mouse lungs  
22 and other microaerobic biofilm-like environments.

23

24



## 1 DISCUSSION

2

3 In this study, we showed that airborne HCN produced by a wide range of *P. aeruginosa*  
4 clinical strains is enhanced in microaerobic conditions and inhibits various *S. aureus*  
5 isolates *in vitro*, disadvantaging *S. aureus* colonization in polymicrobial biofilms. This  
6 occurs both in a CF sputum medium and in an *in vivo* mouse model of pulmonary co-  
7 infection. A number of bacterial infections are characterized by the development of  
8 polymicrobial communities in which complex interactions between bacteria can influence  
9 the outcome of diseases (12, 17, 43, 51). Colonization of the lungs during CF is one of  
10 the best examples of polymicrobial infection that is characterized by excessive mucus  
11 production in airways and decreased mucosal clearance (52). This favors lung  
12 colonization by bacterial pathogens, including *P. aeruginosa*, *S. aureus*, non-typeable  
13 *Haemophilus influenzae* and *Burkholderia cepacia*, where prevalence varies with the age  
14 and treatments of CF patients (52-55). These airway infections are difficult to eradicate  
15 despite aggressive antibiotic therapy (56, 57) and are associated with inflammation,  
16 leading to a progressive decline in lung functions and, ultimately, to respiratory failure  
17 (53, 57-59).

18

19 Interactions between microorganisms have been shown to be key determinants of their  
20 distribution and activity in most ecosystems (12, 58) with several *P. aeruginosa* secreted  
21 molecules shown to inhibit *S. aureus*'s growth (16, 19, 25, 26, 60). By contrast to local  
22 competition driven by short range diffusion (<10  $\mu\text{m}$ ) of most inhibitory metabolic  
23 products, volatile HCN produced by *Pseudomonas* and a number of bacterial species  
24 could play an important role in the spatial organization of microbial communities (31).  
25 HCN could indeed contribute to both local and distant, airborne competition between  
26 microorganisms in physically heterogeneous solid, liquid and gaseous environments such  
27 as the lungs and other organic tissues.

28

29 Our results are of pathophysiological relevance, since CF lungs are known to present  
30 microaerophilic areas and to be commonly associated with the presence of *S. aureus* and  
31 *P. aeruginosa* multispecies biofilms, reaching high *P. aeruginosa* cell density, two  
32 conditions that have been shown to induce *hcnABC* gene expression and subsequent HCN



1 production (30, 31, 34, 36, 61). HCN was indeed previously detected in the sputum and  
2 bronchial-alveolar lavage fluids of CF patients infected by *P. aeruginosa* and the measure  
3 of HCN levels in lungs of CF patients has been used as a non-invasive breath test to  
4 diagnose *P. aeruginosa* infection (44, 62-64). This suggests that the levels of HCN  
5 produced by *P. aeruginosa* in the lung environment could be sufficient to poison aerobic  
6 metabolism and growth, excluding competitors from *P. aeruginosa* ecological niches (39,  
7 44).

8  
9 *S. aureus* had been regarded as one of the initial microbial colonizers of the CF patients'  
10 airways before being displaced by *P. aeruginosa* (14, 20) and our results support the  
11 hypothesis that metabolic poisoning upon HCN production could be a key determinant of  
12 *Pseudomonas* distribution in the lung upon exclusion of *S. aureus* in mixed *in vitro* and  
13 *in vivo* polymicrobial biofilms (19, 28, 34, 39). However, *P. aeruginosa* PAO1 was also  
14 shown to reduce its toxicity towards *S. aureus* or to facilitate *S. aureus* microcolony  
15 formation through alginate production, therefore promoting the coexistence of these two  
16 bacteria (13, 65-67). Consistently, we observed that, although production of HCN by  
17 PAO1 WT reduced the number of *S. aureus* recovered from co-inoculated lungs  
18 compared to co-inoculation with PAO1 $\Delta$ *hcnB*, there was a 1000-fold increase in *S. aureus*  
19 abundance when comparing mono-inoculation and co-inoculation with PAO1 $\Delta$ *hcnB* (Fig.  
20 4C). This indicates that, in absence of HCN, *S. aureus* growth is stimulated by *P.*  
21 *aeruginosa*, which further emphasizes that these two bacteria could engage in complex  
22 negative and positive interactions *in vivo* (67, 68).

23  
24 Our study therefore contributes to a better understanding of *P. aeruginosa* and *S. aureus*  
25 competition in a context relevant to CF airway infection. Whereas further studies will be  
26 required to tease out the respective ecological contribution of HCN and other *P.*  
27 *aeruginosa* factors to outcompete *S. aureus*, our results further illustrate the remarkable  
28 ability of *P. aeruginosa* to adapt and thrive in multispecies communities. The  
29 identification of a volatile compound-based mechanism potentially underlying the  
30 dynamic shift from *S. aureus* to *P. aeruginosa* dominance in polymicrobial infection  
31 opens new perspectives for the management or monitoring of *P. aeruginosa* infections in  
32 lower lung airway infections and other polymicrobial disease contexts.

33

## 1 MATERIALS AND METHODS

2

### 3 *Bacterial strains, plasmids and growth conditions.*

4 Bacterial strains and plasmids used in this study are listed in Table 1. All experiments  
5 were performed in lysogeny broth (LB) medium, supplemented or not with 0.4% (w/v)  
6 glycine and incubated at 37°C. All chemicals were purchased from Sigma-Aldrich.

### 7 *Test in SCFM2 artificial sputum model.*

8 Green fluorescent *P. aeruginosa* (WT or HCN mutant) carrying pMRP9-1 and *S. aureus*  
9 expressing dsRed red fluorescent protein (see Table 1) were grown overnight in Tryptic  
10 Soy Broth (TSB). Cells were washed twice and resuspended in PBS. The optical density  
11 at 600 nm (OD<sub>600</sub>) was measured with a spectrophotometer, and washed bacterial cultures  
12 were inoculated into SCFM2 at an OD<sub>600</sub> = 0.05 (~10<sup>7</sup> CFU/mL) as individuals or in  
13 combination. Cultures were vortexed for 5 to 10 s to disperse bacterial cells in SCFM2.  
14 Five hundred microliters of inoculated SCFM2 was then transferred into each well of  
15 four-well microchamber slides (Lab-Tek; Nunc) and incubated under static conditions at  
16 37°C.

17 **Imaging:** All images were acquired with Zeiss LSM 700 and LSM 880 confocal laser  
18 scanning microscopes utilizing Zen image capture software. Bacterial cells were  
19 visualized via GFP with an excitation wavelength of 488 nm and an emission wavelength  
20 of 509 nm or via dsRed with an excitation wavelength of 587 nm and an emission  
21 wavelength of 610 nm or with a 63× oil immersion objective. SCFM2 images were  
22 acquired by producing 512- by 512-pixel (0.26- by 0.26-μm pixels) 8-bit z-stack images  
23 that were 100 μm from the base of the coverslip. The total volumes of 100-μm z-stack  
24 images were 1822.5 mm<sup>3</sup>. Control images of uninoculated SCFM2 were acquired by  
25 using identical settings to determine the background fluorescence for image analysis.

26 **Image analysis:** All imaging was performed with identical image capture settings. To  
27 determine the background fluorescence in SCFM2, a histogram of detected dsRed and  
28 GFP fluorescence was produced in Imaris v 8.3.1 (Bitplane) for uninoculated SCFM2,  
29 and the average of the three highest voxel values was determined as the background  
30 fluorescence. Averaging across all of the control images, this value was then subtracted  
31 from all experimental images with Imaris. For aggregate and biomass quantification in

1 SCFM2, isosurfaces were produced for all remaining voxels after background subtraction  
2 with the surpass module in Imaris. To detect individual aggregates, the split objects option  
3 in Imaris was enabled and aggregates were defined as objects with volumes of  $>5 \mu\text{m}^3$ .  
4 The total biomass (all voxels detected), average aggregate volume and number of  
5 aggregates were calculated within the vantage module in Imaris. Detected aggregate  
6 isosurfaces were then ordered by volume. Objects that were  $\geq 0.5$  and  $\leq 5.0 \mu\text{m}^3$  were  
7 categorized as dispersed biomass, and objects that were  $>5.0 \mu\text{m}^3$  were categorized as  
8 aggregated biomass. All image data were exported into Microsoft Excel 2016, and graphs  
9 were generated with GraphPad Prism 7.

10

### 11 ***Screening for volatile-mediated HCN phenotypes***

12 To evaluate the activity of HCN released by bacterial liquid culture on recipient test  
13 bacteria, a lidless 3.5 cm Petri dish was placed inside a 9 cm Petri dish, which external  
14 ring was filled with 20 mL of 1.5% LB agar (Supplementary Fig. S1A) (4). Tested  
15 recipient bacteria were spotted as 20  $\mu\text{L}$  drops of  $10^{-4}$  to  $10^{-8}$  serial dilutions of an  
16 overnight culture adjusted to  $\text{OD}_{600} = 1$  filled and *P. aeruginosa* bacterial liquid culture  
17 releasing or not volatile HCN were adjusted to  $\text{OD}_{600} = 3$  and introduced in the middle of  
18 an uncovered Petri dish. The large Petri dish was then closed and incubated for 24 h at  
19  $37^\circ\text{C}$ , in aerobic or microaerobic conditions. Exposure under microaerobic conditions  
20 ( $0.4 - 0.8\% \text{O}_2$ ) was performed in a C400M Ruskinn anaerobic-microaerophilic station.

21

### 22 ***Detection of HCN production***

23 Semi quantitative determination of the levels of HCN production used a method adapted  
24 from previous studies (47). Briefly, using the set-up described in Supplementary Fig.  
25 S1A, Whatman chromatography paper soaked into HCN detection reagent containing  
26 copper(II) ethyl acetoacetate (100mg) and 4,4'-methylenebis-(N,N-dimethylaniline)  
27 (100mg) solubilized in 20 mL chloroform was laid on the surface of the central,  
28 uncovered 3.5cm Petri dish of containing bacterial liquid culture releasing or not volatile  
29 HCN. The large Petri dish was then closed and incubated for 24 h at  $37^\circ\text{C}$  in aerobic or  
30 microaerobic conditions. Exposure under microaerobic conditions ( $0.4 - 0.8\% \text{O}_2$ ) was  
31 performed in a C400M Ruskinn anaerobic-microaerophilic station. The level of HCN was  
32 evaluated based on the intensity of blue color resulting from exposure to bacterial HCN.

## 1 ***In vivo experiments***

2 Specific opportunistic pathogen free (SOPF) Balb/c mice (male, 7 weeks, in particular  
3 free of detectable *S. aureus* and *P. aeruginosa* strain) were ordered in Janvier Labs  
4 (France) and housed in the Institut Pasteur animal facilities. All experiments were  
5 approved by the Ethics Committee of Institut Pasteur (reference 2014-0014). Mice were  
6 infected intratracheally as described previously (19). In brief, mice were anesthetized by  
7 intraperitoneal injection of ketamine (Imalgene 1000<sup>®</sup>, 90mg/kg)/xylazine (Rompun<sup>®</sup>,  
8 10mg/kg) suspended in PBS. The anesthetized animals were subjected to non-invasive  
9 intratracheal catheterization through which *P. aeruginosa* ( $1 \times 10^6$  CFU) and/or *S. aureus*  
10 ( $5 \times 10^5$  CFU) suspended in 50  $\mu$ L of PBS was/were introduced to initiate the infection.  
11 Twenty-four hours post infection, the animals were sacrificed by intraperitoneal injection  
12 of a lethal dose of pentobarbital. The lungs were harvested and homogenized as described  
13 previously (19). The lung homogenates were serially diluted, and the number of bacterial  
14 CFU in the lung was determined by plating and counting bacteria on LB agar (all bacteria)  
15 and/or on *P. aeruginosa* selective PIA plates and *S. aureus* selective MSA plates.

16

## 17 ***Biofilm competition experiments in microfermenters***

18 Continuous-flow biofilm microfermenters containing a removal glass spatula were used  
19 as described in (69) (see also [https://research.pasteur.fr/en/tool/biofilm-](https://research.pasteur.fr/en/tool/biofilm-microfermenters/)  
20 [microfermenters/](https://research.pasteur.fr/en/tool/biofilm-microfermenters/)). Medium flow was adjusted to 60 mL/h with internal bubbling  
21 agitation with filter-sterilized compressed air to minimize planktonic growth over biofilm  
22 development. Inoculation was performed by dipping the glass spatula for 10 min in  
23 overnight OD<sub>600</sub>=1 LB cultures of *S. aureus* and *P. aeruginosa* strains mixed at a 1:1  
24 ratio. The spatula was then reintroduced into the microfermenter and the resulting 48 h  
25 mixed biofilms grown on the fermenter spatula were recovered and corresponding serial  
26 dilutions were plated on LB agar (all bacteria) and/or on *P. aeruginosa* selective PIA  
27 plates and *S. aureus* selective MSA plates.

28

## 29 ***Statistical analysis***

30 Two-tailed unpaired *t-test* with Welch correction analyses were performed using Prism  
31 9.0 for Mac OS X (GraphPad Software). Each experiment was performed at least three  
32 times.

33

1 **ACKNOWLEDGEMENTS**

2 We thank Rebecca Stevick and Inigo Lasa for critical reading of the manuscript. We are  
3 grateful to O. Lesouhaitier for generously providing the *P. aeruginosa*  $\Delta hcnB$  mutant and  
4 to I. Lasa, L. Debarbieux et Susanne Haussler for providing some of the *S. aureus* and *P.*  
5 *aeruginosa* strains used in this study.

6

7 **FUNDING**

8 This work was supported by a grant from the French government's Investissement  
9 d'Avenir Program, Laboratoire d'Excellence "Integrative Biology of Emerging  
10 Infectious Diseases" (grant ANR-10-LABX-62-IBEID), the Fondation Air Liquide and  
11 the Fondation pour la Recherche Médicale (grant DEQ20180339185). Sophie E. Darch  
12 was supported by a Cystic Fibrosis Foundation postdoctoral fellowship (DARCH16F0)

13

14 **AUTHORS CONTRIBUTION**

15 S.L., Y.W., S.E. D., J.-M.G and C.B. performed the experiments; J.-M.G., S.L., L.T.,  
16 C.B., M.W and S.E.D designed the experiments. S.L., C.B., L.T. S.E.D, M.W and J.-  
17 M.G., analyzed the data. J.-M.G. provided resources and funding. J.-M.G. wrote the  
18 manuscript with significant contribution from all co-authors.

19

20 **COMPETING INTEREST**

21 We declare no competing financial interests.

22

23

24

## 1 REFERENCES

- 2
- 3 1. **Schulz-Bohm K, Martín-Sánchez L, Garbeva P.** 2017. Microbial Volatiles: Small  
4 Molecules with an Important Role in Intra- and Inter-Kingdom Interactions. *Frontiers in*  
5 *microbiology* **8**:2484.10.3389/fmicb.2017.02484: 10.3389/fmicb.2017.02484
- 6 2. **Weisskopf L, Schulz S, Garbeva P.** 2021. Microbial volatile organic compounds in  
7 intra-kingdom and inter-kingdom interactions. *Nat Rev Microbiol* **19**:391-  
8 404.10.1038/s41579-020-00508-1: 10.1038/s41579-020-00508-1
- 9 3. **Kai M, Hausteil M, Molina F, Petri A, Scholz B, Piechulla B.** 2009. Bacterial  
10 volatiles and their action potential. *Applied Microbiology and Biotechnology* **81**:1001-  
11 1012
- 12 4. **Bernier SP, Letoffe S, Delepierre M, Ghigo JM.** 2011. Biogenic ammonia modifies  
13 antibiotic resistance at a distance in physically separated bacteria. *Molecular*  
14 *microbiology* **81**:705-716.10.1111/j.1365-2958.2011.07724.x: 10.1111/j.1365-  
15 2958.2011.07724.x
- 16 5. **Kesarwani M, Hazan R, He J, Que YA, Apidianakis Y, Lesic B, Xiao G, Dekimpe**  
17 **V, Milot S, Deziel E, Lepine F, Rahme LG.** 2011. A quorum sensing regulated small  
18 volatile molecule reduces acute virulence and promotes chronic infection phenotypes.  
19 *PLoS pathogens* **7**:e1002192.10.1371/journal.ppat.1002192:  
20 10.1371/journal.ppat.1002192
- 21 6. **Kim KS, Lee S, Ryu CM.** 2013. Interspecific bacterial sensing through airborne  
22 signals modulates locomotion and drug resistance. *Nat Commun*  
23 **4**:1809.10.1038/ncomms2789: 10.1038/ncomms2789
- 24 7. **Bos LDJ, Sterk PJ, Schultz MJ.** 2013. Volatile Metabolites of Pathogens: A  
25 Systematic Review. *PLoS pathogens* **9**:e1003311.10.1371/journal.ppat.1003311:  
26 10.1371/journal.ppat.1003311
- 27 8. **Audrain B, Farag MA, Ryu CM, Ghigo JM.** 2015. Role of bacterial volatile  
28 compounds in bacterial biology. *FEMS Microbiol Rev* **39**:222-  
29 233.10.1093/femsre/fuu013: 10.1093/femsre/fuu013
- 30 9. **Govan JR, Deretic V.** 1996. Microbial pathogenesis in cystic fibrosis: mucoid  
31 *Pseudomonas aeruginosa* and *Burkholderia cepacia*. *Microbiol Rev* **60**:539-  
32 574.10.1128/mr.60.3.539-574.1996: 10.1128/mr.60.3.539-574.1996
- 33 10. **Harrison F.** 2007. Microbial ecology of the cystic fibrosis lung. *Microbiology*  
34 (Reading) **153**:917-923.10.1099/mic.0.2006/004077-0: 10.1099/mic.0.2006/004077-0
- 35 11. **Hogan DA, Willger SD, Dolben EL, Hampton TH, Stanton BA, Morrison HG,**  
36 **Sogin ML, Czum J, Ashare A.** 2016. Analysis of Lung Microbiota in Bronchoalveolar  
37 Lavage, Protected Brush and Sputum Samples from Subjects with Mild-To-Moderate  
38 Cystic Fibrosis Lung Disease. *PLoS One* **11**:e0149998.10.1371/journal.pone.0149998:  
39 10.1371/journal.pone.0149998
- 40 12. **Stacy A, McNally L, Darch SE, Brown SP, Whiteley M.** 2016. The biogeography of  
41 polymicrobial infection. *Nat Rev Microbiol* **14**:93-105.10.1038/nrmicro.2015.8:  
42 10.1038/nrmicro.2015.8
- 43 13. **Limoli DH, Whitfield GB, Kitao T, Ivey ML, Davis MR, Jr., Grahl N, Hogan DA,**  
44 **Rahme LG, Howell PL, O'Toole GA, Goldberg JB.** 2017. *Pseudomonas aeruginosa*  
45 Alginate Overproduction Promotes Coexistence with *Staphylococcus aureus* in a Model  
46 of Cystic Fibrosis Respiratory Infection. *mBio* **8**.10.1128/mBio.00186-17:  
47 10.1128/mBio.00186-17
- 48 14. **Woods PW, Haynes ZM, Mina EG, Marques CNH.** 2018. Maintenance of *S. aureus*  
49 in Co-culture With *P. aeruginosa* While Growing as Biofilms. *Frontiers in microbiology*  
50 **9**:3291.10.3389/fmicb.2018.03291: 10.3389/fmicb.2018.03291
- 51 15. **Niggli S, Kümmerli R.** 2020. Strain Background, Species Frequency, and  
52 Environmental Conditions Are Important in Determining *Pseudomonas aeruginosa* and



- 1 Staphylococcus aureus Population Dynamics and Species Coexistence. Appl Environ  
2 Microbiol **86**.10.1128/aem.00962-20: 10.1128/aem.00962-20
- 3 16. **Hoffman LR, Déziel E, D'Argenio DA, Lépine F, Emerson J, McNamara S, Gibson**  
4 **RL, Ramsey BW, Miller SI.** 2006. Selection for Staphylococcus aureus small-colony  
5 variants due to growth in the presence of Pseudomonas aeruginosa. Proc Natl Acad Sci  
6 U S A **103**:19890-19895.10.1073/pnas.0606756104: 10.1073/pnas.0606756104
- 7 17. **Hibbing ME, Fuqua C, Parsek MR, Peterson SB.** 2010. Bacterial competition:  
8 surviving and thriving in the microbial jungle. Nat Rev Microbiol **8**:15-  
9 25.10.1038/nrmicro2259: 10.1038/nrmicro2259
- 10 18. **Baldan R, Cigana C, Testa F, Bianconi I, De Simone M, Pellin D, Di Serio C,**  
11 **Bragonzi A, Cirillo DM.** 2014. Adaptation of Pseudomonas aeruginosa in Cystic  
12 Fibrosis airways influences virulence of Staphylococcus aureus in vitro and murine  
13 models of co-infection. PLoS One **9**:e89614.10.1371/journal.pone.0089614:  
14 10.1371/journal.pone.0089614
- 15 19. **Pernet E, Guillemot L, Burgel PR, Martin C, Lambeau G, Sermet-Gaudelus I,**  
16 **Sands D, Leduc D, Morand PC, Jeammet L, Chignard M, Wu Y, Touqui L.** 2014.  
17 Pseudomonas aeruginosa eradicates Staphylococcus aureus by manipulating the host  
18 immunity. Nat Commun **5**:5105.10.1038/ncomms6105: 10.1038/ncomms6105
- 19 20. **Hotterbeekx A, Kumar-Singh S, Goossens H, Malhotra-Kumar S.** 2017. In vivo and  
20 In vitro Interactions between Pseudomonas aeruginosa and Staphylococcus spp. Front  
21 Cell Infect Microbiol **7**:106.10.3389/fcimb.2017.00106: 10.3389/fcimb.2017.00106
- 22 21. **Machan ZA, Taylor GW, Pitt TL, Cole PJ, Wilson R.** 1992. 2-Heptyl-4-  
23 hydroxyquinoline N-oxide, an antistaphylococcal agent produced by Pseudomonas  
24 aeruginosa. J Antimicrob Chemother **30**:615-623.10.1093/jac/30.5.615:  
25 10.1093/jac/30.5.615
- 26 22. **Kessler E, Safrin M, Olson JC, Ohman DE.** 1993. Secreted LasA of Pseudomonas  
27 aeruginosa is a staphylolytic protease. J Biol Chem **268**:7503-7508
- 28 23. **Brint JM, Ohman DE.** 1995. Synthesis of multiple exoproducts in Pseudomonas  
29 aeruginosa is under the control of RhIR-RhII, another set of regulators in strain PAO1  
30 with homology to the autoinducer-responsive LuxR-LuxI family. J Bacteriol **177**:7155-  
31 7163.10.1128/jb.177.24.7155-7163.1995: 10.1128/jb.177.24.7155-7163.1995
- 32 24. **Bharali P, Saikia JP, Ray A, Konwar BK.** 2013. Rhamnolipid (RL) from  
33 Pseudomonas aeruginosa OBP1: a novel chemotaxis and antibacterial agent. Colloids  
34 Surf B Biointerfaces **103**:502-509.10.1016/j.colsurfb.2012.10.064:  
35 10.1016/j.colsurfb.2012.10.064
- 36 25. **Nguyen AT, Oglesby-Sherrouse AG.** 2015. Spoils of war: iron at the crux of clinical  
37 and ecological fitness of Pseudomonas aeruginosa. Biometals **28**:433-  
38 443.10.1007/s10534-015-9848-6: 10.1007/s10534-015-9848-6
- 39 26. **Biswas L, Götz F.** 2021. Molecular Mechanisms of Staphylococcus and Pseudomonas  
40 Interactions in Cystic Fibrosis. Front Cell Infect Microbiol  
41 **11**:824042.10.3389/fcimb.2021.824042: 10.3389/fcimb.2021.824042
- 42 27. **Goeminne PC, Vandendriessche T, Van Eldere J, Nicolai BM, Hertog ML, Dupont**  
43 **LJ.** 2012. Detection of Pseudomonas aeruginosa in sputum headspace through volatile  
44 organic compound analysis. Respir Res **13**:87.10.1186/1465-9921-13-87:  
45 10.1186/1465-9921-13-87
- 46 28. **Zdor RE.** 2015. Bacterial cyanogenesis: impact on biotic interactions. J Appl Microbiol  
47 **118**:267-274.10.1111/jam.12697: 10.1111/jam.12697
- 48 29. **Elmassry MM, Piechulla B.** 2020. Volatilomes of Bacterial Infections in Humans.  
49 Front Neurosci **14**:257.10.3389/fnins.2020.00257: 10.3389/fnins.2020.00257
- 50 30. **Castric PA.** 1975. Hydrogen cyanide, a secondary metabolite of Pseudomonas  
51 aeruginosa. Can J Microbiol **21**:613-618.10.1139/m75-088: 10.1139/m75-088



- 1 31. **Blumer C, Haas D.** 2000. Mechanism, regulation, and ecological role of bacterial  
2 cyanide biosynthesis. *Archives of microbiology* **173**:170-177.10.1007/s002039900127:  
3 10.1007/s002039900127
- 4 32. **Knowles CJ, Bunch AW.** 1986. Microbial cyanide metabolism. *Adv Microb Physiol*  
5 **27**:73-111.10.1016/s0065-2911(08)60304-5: 10.1016/s0065-2911(08)60304-5
- 6 33. **Laville J, Blumer C, Von Schroetter C, Gaia V, Défago G, Keel C, Haas D.** 1998.  
7 Characterization of the hcnABC gene cluster encoding hydrogen cyanide synthase and  
8 anaerobic regulation by ANR in the strictly aerobic biocontrol agent *Pseudomonas*  
9 *fluorescens* CHA0. *J Bacteriol* **180**:3187-3196.10.1128/jb.180.12.3187-3196.1998:  
10 10.1128/jb.180.12.3187-3196.1998
- 11 34. **Williams HD, Zlosnik JE, Ryall B.** 2007. Oxygen, cyanide and energy generation in  
12 the cystic fibrosis pathogen *Pseudomonas aeruginosa*. *Adv Microb Physiol* **52**:1-  
13 71.10.1016/s0065-2911(06)52001-6: 10.1016/s0065-2911(06)52001-6
- 14 35. **Blier AS, Vieillard J, Gerault E, Dagorn A, Varacavoudin T, Le Derf F, Orange N,**  
15 **Feuilloy M, Lesouhaitier O.** 2012. Quantification of *Pseudomonas aeruginosa*  
16 hydrogen cyanide production by a polarographic approach. *Journal of microbiological*  
17 *methods* **90**:20-24.10.1016/j.mimet.2012.04.005: 10.1016/j.mimet.2012.04.005
- 18 36. **Pessi G, Haas D.** 2000. Transcriptional control of the hydrogen cyanide biosynthetic  
19 genes hcnABC by the anaerobic regulator ANR and the quorum-sensing regulators  
20 LasR and RhlR in *Pseudomonas aeruginosa*. *J Bacteriol* **182**:6940-  
21 6949.10.1128/jb.182.24.6940-6949.2000: 10.1128/jb.182.24.6940-6949.2000
- 22 37. **Carterson AJ, Morici LA, Jackson DW, Frisk A, Lizewski SE, Jupiter R, Simpson**  
23 **K, Kunz DA, Davis SH, Schurr JR, Hassett DJ, Schurr MJ.** 2004. The  
24 transcriptional regulator AlgR controls cyanide production in *Pseudomonas aeruginosa*.  
25 *J Bacteriol* **186**:6837-6844.10.1128/jb.186.20.6837-6844.2004:  
26 10.1128/jb.186.20.6837-6844.2004
- 27 38. **Cody WL, Pritchett CL, Jones AK, Carterson AJ, Jackson D, Frisk A, Wolfgang**  
28 **MC, Schurr MJ.** 2009. *Pseudomonas aeruginosa* AlgR controls cyanide production in  
29 an AlgZ-dependent manner. *J Bacteriol* **191**:2993-3002.10.1128/jb.01156-08:  
30 10.1128/jb.01156-08
- 31 39. **Anderson RD, Roddam LF, Bettiol S, Sanderson K, Reid DW.** 2010.  
32 Biosignificance of bacterial cyanogenesis in the CF lung. *J Cyst Fibros* **9**:158-  
33 164.10.1016/j.jcf.2009.12.003: 10.1016/j.jcf.2009.12.003
- 34 40. **Gallagher LA, Manoil C.** 2001. *Pseudomonas aeruginosa* PAO1 kills *Caenorhabditis*  
35 *elegans* by cyanide poisoning. *J Bacteriol* **183**:6207-6214.10.1128/jb.183.21.6207-  
36 6214.2001: 10.1128/jb.183.21.6207-6214.2001
- 37 41. **Broderick KE, Chan A, Balasubramanian M, Feala J, Reed SL, Panda M, Sharma**  
38 **VS, Pilz RB, Bigby TD, Boss GR.** 2008. Cyanide produced by human isolates of  
39 *Pseudomonas aeruginosa* contributes to lethality in *Drosophila melanogaster*. *The*  
40 *Journal of infectious diseases* **197**:457-464.10.1086/525282: 10.1086/525282
- 41 42. **Blom D, Fabbri C, Eberl L, Weisskopf L.** 2011. Volatile-mediated killing of  
42 *Arabidopsis thaliana* by bacteria is mainly due to hydrogen cyanide. *Applied and*  
43 *environmental microbiology* **77**:1000-1008.10.1128/AEM.01968-10:  
44 10.1128/AEM.01968-10
- 45 43. **Peters BM, Jabra-Rizk MA, O'May GA, Costerton JW, Shirtliff ME.** 2012.  
46 Polymicrobial interactions: impact on pathogenesis and human disease. *Clin Microbiol*  
47 *Rev* **25**:193-213.10.1128/cmr.00013-11: 10.1128/cmr.00013-11
- 48 44. **Sanderson K, Wescombe L, Kirov SM, Champion A, Reid DW.** 2008. Bacterial  
49 cyanogenesis occurs in the cystic fibrosis lung. *Eur Respir J* **32**:329-  
50 333.10.1183/09031936.00152407: 10.1183/09031936.00152407
- 51 45. **Voggu L, Schlag S, Biswas R, Rosenstein R, Rausch C, Götz F.** 2006.  
52 Microevolution of cytochrome bd oxidase in *Staphylococci* and its implication in

- 1 resistance to respiratory toxins released by *Pseudomonas*. *J Bacteriol* **188**:8079-  
2 8086.10.1128/jb.00858-06: 10.1128/jb.00858-06
- 3 46. **Holloway BW**. 1955. Genetic recombination in *Pseudomonas aeruginosa*. *J Gen*  
4 *Microbiol* **13**:572-581.10.1099/00221287-13-3-572: 10.1099/00221287-13-3-572
- 5 47. **Castric KF, Castric PA**. 1983. Method for rapid detection of cyanogenic bacteria.  
6 *Appl Environ Microbiol* **45**:701-702
- 7 48. **Kinkel TL, Roux CM, Dunman PM, Fang FC**. 2013. The *Staphylococcus aureus*  
8 *SrrAB* two-component system promotes resistance to nitrosative stress and hypoxia.  
9 *MBio* **4**:e00696-00613.10.1128/mBio.00696-13: 10.1128/mBio.00696-13
- 10 49. **Stewart PS, Franklin MJ**. 2008. Physiological heterogeneity in biofilms. *Nat Rev*  
11 *Microbiol* **6**:199-210.10.1038/nrmicro1838: 10.1038/nrmicro1838
- 12 50. **Darch SE, Simoska O, Fitzpatrick M, Barraza JP, Stevenson KJ, Bonnez RT,**  
13 **Shear JB, Whiteley M**. 2018. Spatial determinants of quorum signaling in a  
14 *Pseudomonas aeruginosa* infection model. *Proc Natl Acad Sci U S A* **115**:4779-  
15 4784.10.1073/pnas.1719317115: 10.1073/pnas.1719317115
- 16 51. **Smith H**. 1982. The role of microbial interactions in infectious disease. *Philos Trans R*  
17 *Soc Lond B Biol Sci* **297**:551-561.10.1098/rstb.1982.0060: 10.1098/rstb.1982.0060
- 18 52. **Sibley CD, Rabin H, Surette MG**. 2006. Cystic fibrosis: a polymicrobial infectious  
19 disease. *Future Microbiol* **1**:53-61.10.2217/17460913.1.1.53: 10.2217/17460913.1.1.53
- 20 53. **Ratjen F, Döring G**. 2003. Cystic fibrosis. *Lancet* **361**:681-689.10.1016/s0140-  
21 6736(03)12567-6: 10.1016/s0140-6736(03)12567-6
- 22 54. **Hubert D, Réglie-Poupet H, Sermet-Gaudelus I, Ferroni A, Le Bourgeois M,**  
23 **Burgel PR, Serreau R, Dusser D, Poyart C, Coste J**. 2013. Association between  
24 *Staphylococcus aureus* alone or combined with *Pseudomonas aeruginosa* and the  
25 clinical condition of patients with cystic fibrosis. *J Cyst Fibros* **12**:497-  
26 503.10.1016/j.jcf.2012.12.003: 10.1016/j.jcf.2012.12.003
- 27 55. **Zolin A, Orenti A, van Rens J, Fox A, Krasnyk M, Jung A, Mei-Zahav M, Cosgriff**  
28 **R, Storms V, Naehrlich L**. 2019. ECFSPR Annual Report 2017.
- 29 56. **Garcia-Medina R, Dunne WM, Singh PK, Brody SL**. 2005. *Pseudomonas*  
30 *aeruginosa* acquires biofilm-like properties within airway epithelial cells. *Infect Immun*  
31 **73**:8298-8305.10.1128/iai.73.12.8298-8305.2005: 10.1128/iai.73.12.8298-8305.2005
- 32 57. **Martin I, Waters V, Grasmann H**. 2021. Approaches to Targeting Bacterial Biofilms  
33 in Cystic Fibrosis Airways. *Int J Mol Sci* **22**.10.3390/ijms22042155:  
34 10.3390/ijms22042155
- 35 58. **Keller L, Surette MG**. 2006. Communication in bacteria: an ecological and  
36 evolutionary perspective. *Nature reviews. Microbiology* **4**:249-  
37 258.10.1038/nrmicro1383: 10.1038/nrmicro1383
- 38 59. **O'Sullivan BP, Freedman SD**. 2009. Cystic fibrosis. *Lancet* **373**:1891-  
39 1904.10.1016/s0140-6736(09)60327-5: 10.1016/s0140-6736(09)60327-5
- 40 60. **Nguyen AT, Oglesby-Sherrouse AG**. 2016. Interactions between *Pseudomonas*  
41 *aeruginosa* and *Staphylococcus aureus* during co-cultivations and polymicrobial  
42 infections. *Appl Microbiol Biotechnol* **100**:6141-6148.10.1007/s00253-016-7596-3:  
43 10.1007/s00253-016-7596-3
- 44 61. **Worlitzsch D, Tarran R, Ulrich M, Schwab U, Cekici A, Meyer KC, Birrer P,**  
45 **Bellon G, Berger J, Weiss T, Botzenhart K, Yankaskas JR, Randell S, Boucher**  
46 **RC, Döring G**. 2002. Effects of reduced mucus oxygen concentration in airway  
47 *Pseudomonas* infections of cystic fibrosis patients. *J Clin Invest* **109**:317-  
48 325.10.1172/jci13870: 10.1172/jci13870
- 49 62. **Ryall B, Davies JC, Wilson R, Shoemark A, Williams HD**. 2008. *Pseudomonas*  
50 *aeruginosa*, cyanide accumulation and lung function in CF and non-CF bronchiectasis  
51 patients. *Eur Respir J* **32**:740-747.10.1183/09031936.00159607:  
52 10.1183/09031936.00159607

- 1 63. **Stutz MD, Gangell CL, Berry LJ, Garratt LW, Sheil B, Sly PD.** 2011. Cyanide in  
2 bronchoalveolar lavage is not diagnostic for *Pseudomonas aeruginosa* in children with  
3 cystic fibrosis. *Eur Respir J* **37**:553-558.10.1183/09031936.00024210:  
4 10.1183/09031936.00024210
- 5 64. **Gilchrist FJ, Bright-Thomas RJ, Jones AM, Smith D, Spaněl P, Webb AK, Lenney**  
6 **W.** 2013. Hydrogen cyanide concentrations in the breath of adult cystic fibrosis patients  
7 with and without *Pseudomonas aeruginosa* infection. *J Breath Res*  
8 **7**:026010.10.1088/1752-7155/7/2/026010: 10.1088/1752-7155/7/2/026010
- 9 65. **Yang L, Liu Y, Markussen T, Høiby N, Tolker-Nielsen T, Molin S.** 2011. Pattern  
10 differentiation in co-culture biofilms formed by *Staphylococcus aureus* and  
11 *Pseudomonas aeruginosa*. *FEMS Immunol Med Microbiol* **62**:339-347.10.1111/j.1574-  
12 695X.2011.00820.x: 10.1111/j.1574-695X.2011.00820.x
- 13 66. **Price CE, Brown DG, Limoli DH, Phelan VV, O'Toole GA.** 2020. Exogenous  
14 Alginate Protects *Staphylococcus aureus* from Killing by *Pseudomonas aeruginosa*. *J*  
15 *Bacteriol* **202**.10.1128/jb.00559-19: 10.1128/jb.00559-19
- 16 67. **Camus L, Briaud P, Vandenesch F, Moreau K.** 2021. How Bacterial Adaptation to  
17 Cystic Fibrosis Environment Shapes Interactions Between *Pseudomonas aeruginosa* and  
18 *Staphylococcus aureus*. *Frontiers in microbiology*  
19 **12**:617784.10.3389/fmicb.2021.617784: 10.3389/fmicb.2021.617784
- 20 68. **Barraza JP, Whiteley M.** 2021. A *Pseudomonas aeruginosa* Antimicrobial Affects the  
21 Biogeography but Not Fitness of *Staphylococcus aureus* during Coculture. *mBio*  
22 **12**.10.1128/mBio.00047-21: 10.1128/mBio.00047-21
- 23 69. **Ghigo JM.** 2001. Natural conjugative plasmids induce bacterial biofilm development.  
24 *Nature* **412**:442-445.10.1038/35086581
- 25 70. **Davies DG, Parsek MR, Pearson JP, Iglewski BH, Costerton JW, Greenberg EP.**  
26 1998. The involvement of cell-to-cell signals in the development of a bacterial biofilm.  
27 *Science* **280**:295-298.10.1126/science.280.5361.295: 10.1126/science.280.5361.295
- 28 71. **Schroth MN, Cho JJ, Green SK, Kominos SD, Microbiology Society P.** 1977.  
29 Epidemiology of *Pseudomonas aeruginosa* in agricultural areas(). *J Med Microbiol*  
30 **67**:1191-1201.10.1099/jmm.0.000758: 10.1099/jmm.0.000758
- 31 72. **Takeya K, Amako K.** 1966. A rod-shaped *Pseudomonas* phage. *Virology* **28**:163-  
32 165.10.1016/0042-6822(66)90317-5: 10.1016/0042-6822(66)90317-5
- 33 73. **Khaledi A, Weimann A, Schniederjans M, Asgari E, Kuo TH, Oliver A, Cabot G,**  
34 **Kola A, Gastmeier P, Hogardt M, Jonas D, Mofrad MR, Bremges A, McHardy**  
35 **AC, Häussler S.** 2020. Predicting antimicrobial resistance in *Pseudomonas aeruginosa*  
36 with machine learning-enabled molecular diagnostics. *EMBO Mol Med*  
37 **12**:e10264.10.15252/emmm.201910264: 10.15252/emmm.201910264
- 38 74. **Lebeaux D, Larroque B, Gellen-Dautremer J, Leflon-Guibout V, Dreyer C, Bialek**  
39 **S, Froissart A, Hentic O, Tessier C, Ruimy R, Pelletier AL, Crestani B, Fournier**  
40 **M, Papo T, Barry B, Zarrouk V, Fantin B.** 2012. Clinical outcome after a totally  
41 implantable venous access port-related infection in cancer patients: a prospective study  
42 and review of the literature. *Medicine (Baltimore)* **91**:309-  
43 318.10.1097/MD.0b013e318275ffe1: 10.1097/MD.0b013e318275ffe1
- 44 75. **Baba T, Takeuchi F, Kuroda M, Yuzawa H, Aoki K, Oguchi A, Nagai Y, Iwama N,**  
45 **Asano K, Naimi T, Kuroda H, Cui L, Yamamoto K, Hiramatsu K.** 2002. Genome  
46 and virulence determinants of high virulence community-acquired MRSA. *Lancet*  
47 **359**:1819-1827.10.1016/s0140-6736(02)08713-5: 10.1016/s0140-6736(02)08713-5
- 48 76. **Villanueva M, García B, Valle J, Rapún B, Ruiz de Los Mozos I, Solano C, Martí**  
49 **M, Penadés JR, Toledo-Arana A, Lasa I.** 2018. Sensory deprivation in  
50 *Staphylococcus aureus*. *Nat Commun* **9**:523.10.1038/s41467-018-02949-y:  
51 10.1038/s41467-018-02949-y
- 52 77. **Valle J, Toledo-Arana A, Berasain C, Ghigo JM, Amorena B, Penadés JR, Lasa I.**  
53 2003. SarA and not sigmaB is essential for biofilm development by *Staphylococcus*

- 1 aureus. *Mol Microbiol* **48**:1075-1087.10.1046/j.1365-2958.2003.03493.x:  
2 10.1046/j.1365-2958.2003.03493.x
- 3 78. **Shafer WM, Iandolo JJ.** 1979. Genetics of staphylococcal enterotoxin B in  
4 methicillin-resistant isolates of *Staphylococcus aureus*. *Infect Immun* **25**:902-  
5 911.10.1128/iai.25.3.902-911.1979: 10.1128/iai.25.3.902-911.1979
- 6 79. **Duthie ES, Lorenz LL.** 1952. Staphylococcal coagulase; mode of action and  
7 antigenicity. *J Gen Microbiol* **6**:95-107.10.1099/00221287-6-1-2-95:  
8 10.1099/00221287-6-1-2-95
- 9 80. **Herbert S, Ziebandt AK, Ohlsen K, Schäfer T, Hecker M, Albrecht D, Novick R,**  
10 **Götz F.** 2010. Repair of global regulators in *Staphylococcus aureus* 8325 and  
11 comparative analysis with other clinical isolates. *Infect Immun* **78**:2877-  
12 2889.10.1128/iai.00088-10: 10.1128/iai.00088-10
- 13 81. **Kuroda M, Ohta T, Uchiyama I, Baba T, Yuzawa H, Kobayashi I, Cui L, Oguchi**  
14 **A, Aoki K, Nagai Y, Lian J, Ito T, Kanamori M, Matsumaru H, Maruyama A,**  
15 **Murakami H, Hosoyama A, Mizutani-Ui Y, Takahashi NK, Sawano T, Inoue R,**  
16 **Kaito C, Sekimizu K, Hirakawa H, Kuhara S, Goto S, Yabuzaki J, Kanehisa M,**  
17 **Yamashita A, Oshima K, Furuya K, Yoshino C, Shiba T, Hattori M, Ogasawara**  
18 **N, Hayashi H, Hiramatsu K.** 2001. Whole genome sequencing of methicillin-resistant  
19 *Staphylococcus aureus*. *Lancet* **357**:1225-1240.10.1016/s0140-6736(00)04403-2:  
20 10.1016/s0140-6736(00)04403-2
- 21 82. **Kennedy AD, Otto M, Braughton KR, Whitney AR, Chen L, Mathema B,**  
22 **Mediavilla JR, Byrne KA, Parkins LD, Tenover FC, Kreiswirth BN, Musser JM,**  
23 **DeLeo FR.** 2008. Epidemic community-associated methicillin-resistant *Staphylococcus*  
24 *aureus*: recent clonal expansion and diversification. *Proc Natl Acad Sci U S A*  
25 **105**:1327-1332.10.1073/pnas.0710217105: 10.1073/pnas.0710217105
- 26 83. **Ibberson CB, Parlet CP, Kwiecinski J, Crosby HA, Meyerholz DK, Horswill AR.**  
27 2016. Hyaluronan Modulation Impacts *Staphylococcus aureus* Biofilm Infection. *Infect*  
28 *Immun* **84**:1917-1929.10.1128/iai.01418-15: 10.1128/iai.01418-15
- 29 84. **Cucarella C, Solano C, Valle J, Amorena B, Lasa I, Penadés JR.** 2001. Bap, a  
30 *Staphylococcus aureus* surface protein involved in biofilm formation. *J Bacteriol*  
31 **183**:2888-2896.10.1128/jb.183.9.2888-2896.2001: 10.1128/jb.183.9.2888-2896.2001  
32

1 **Table 1: Plasmids and strains used in the study**  
2

|                                              | Relevant characteristics or origin                                                                      | Reference / source                                                |
|----------------------------------------------|---------------------------------------------------------------------------------------------------------|-------------------------------------------------------------------|
| <b>Plasmids</b>                              |                                                                                                         |                                                                   |
| pMRP9-1                                      | <i>gfp</i> -expressing plasmid                                                                          | (70)                                                              |
| <b><i>Pseudomonas aeruginosa</i> strains</b> |                                                                                                         |                                                                   |
| PAO1                                         | Isolate from wound infection, Melbourne                                                                 | (46)                                                              |
| PAO1 <i>gfp</i>                              | Green fluorescent PAO1 containing pMRP9-1                                                               | This study                                                        |
| PAO1 $\Delta$ <i>hcnB</i>                    | HCN deficient $\Delta$ <i>hcnB</i> strain                                                               | University of Washington Genome Center, Gift from O. Lesouhaitier |
| PAO1 $\Delta$ <i>hcnB gfp</i>                | Green fluorescent PAO1 $\Delta$ <i>hcnB</i> containing pMRP9-1                                          | This study                                                        |
| PA14                                         | Clinical isolates from burn patients                                                                    | (71)                                                              |
| PAK                                          | Virulent strain sensitive to Pf phage                                                                   | (72)                                                              |
| 7508                                         | Bronchial secretion                                                                                     | (73)                                                              |
| 8931                                         | Lung transplant                                                                                         | (73)                                                              |
| 9854                                         | Nasal swab                                                                                              | (73)                                                              |
| 11989                                        | Tonsil swab                                                                                             | (73)                                                              |
| 12269                                        | Sputum                                                                                                  | (73)                                                              |
| 13305                                        | Bronchial secretion                                                                                     | (73)                                                              |
| Psae1152                                     | Drainage catheter                                                                                       | (73)                                                              |
| Psae1471                                     | Respiratory tract                                                                                       | (73)                                                              |
| Psae1659                                     | Respiratory tract                                                                                       | (73)                                                              |
| Psae1716                                     | Blood                                                                                                   | (73)                                                              |
| Psae1928                                     | Respiratory tract                                                                                       | (73)                                                              |
| Psae2328                                     | Urine                                                                                                   | (73)                                                              |
| BJN8                                         | Catheter related blood stream infection related BSI from Beaujon Hospital. Patient#8.                   | (74)                                                              |
| BJN33                                        | Catheter related blood stream infection related BSI from Beaujon Hospital. Patient#33.                  | (74)                                                              |
| BJN53                                        | Catheter related blood stream infection related BSI from Beaujon Hospital. Patient#53.                  | (74)                                                              |
| BJN66                                        | Catheter related blood stream infection related BSI from Beaujon Hospital. Patient#66.                  | (74)                                                              |
| <b><i>Staphylococcus aureus</i></b>          |                                                                                                         |                                                                   |
| MW2                                          | Community-acquired methicillin-resistant                                                                | (75)                                                              |
| MW2 $\Delta$ <i>srrAB</i>                    | Deletion of <i>srrAB</i> genes                                                                          | Gift from I. Lasa (76)                                            |
| 15981                                        | Biofilm-forming strain isolated at the Microbiology Department of the University Clinics of Navarra     | (77)                                                              |
| COL                                          | Initially isolated from the operating theatre in a hospital in Colindale, England in the early 1960s.   | (78)                                                              |
| Newman                                       | <i>S. aureus</i> strain Newman was isolated in 1952 from a human infection                              | (79)                                                              |
| Xen36                                        | Xen 36                                                                                                  | Caliper Life Sciences,                                            |
| HG001                                        | Highly virulent strain derivative of NCTC 8325 originally used to propagate bacteriophage 47            | (80)                                                              |
| N315                                         | hospital-acquired methicillin-resistant isolated in 1982 from a pharyngeal smear of a patient in Japan. | (81)                                                              |
| USA300LAC                                    | Epidemic community-associated methicillin-resistant isolated from the Los Angeles County jail           | (82)                                                              |
| USA300LAC <i>dsred</i>                       |                                                                                                         | (83)                                                              |
| V329                                         | Biofilm forming bovine mastitis isolate                                                                 | (84)                                                              |



1  
2

## FIGURES

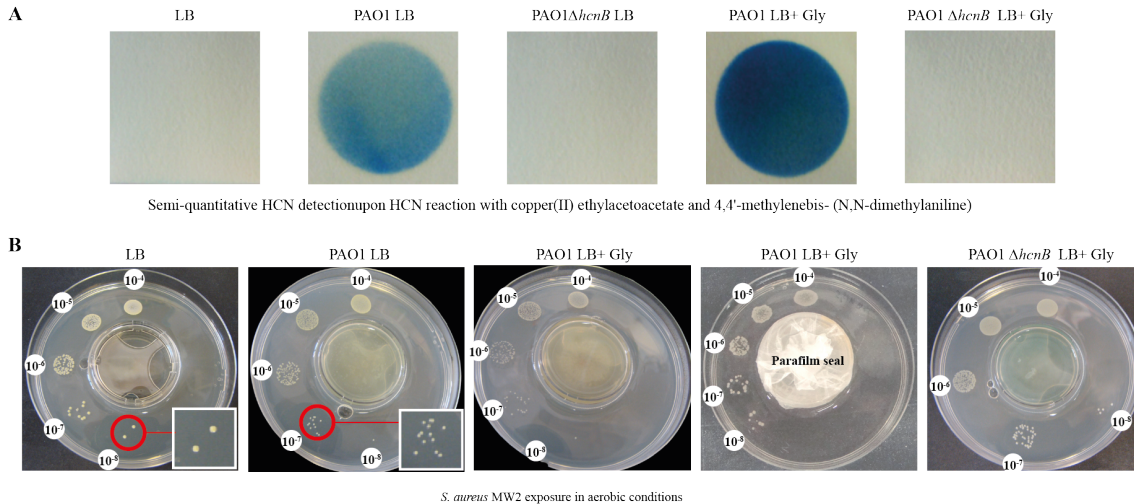

3  
4  
5  
6  
7  
8  
9  
10  
11  
12  
13  
14

Figure 1. *P. aeruginosa* production of hydrogen cyanide leads to airborne inhibition of *S. aureus* growth. **A:** Semi-quantitative detection of volatile HCN emitted from *P. aeruginosa* WT and  $\Delta hcnB$ , in LB supplemented or not with 0.4% (w/v) glycine, after 24h incubation at 37°C in aerobic conditions. HCN detection is based on HCN reaction with copper (II) ethylacetoacetate and 4,4'-methylenebis-(N,N-dimethylaniline). **B:** Serial dilution of *S. aureus* MW2 upon exposure to *P. aeruginosa* WT or  $\Delta hcnB$  cultures in LB supplemented or not with 0.4% (w/v) glycine in the 2-Petri-dish assay (see Supplementary Fig. S1). No inhibition of *S. aureus* MW2 growth is observed when the middle plate containing *P. aeruginosa* culture is covered and sealed with parafilm. Pictures were taken after 24h of incubation at 37°C in aerobic conditions. Each experiment was performed at least three times.

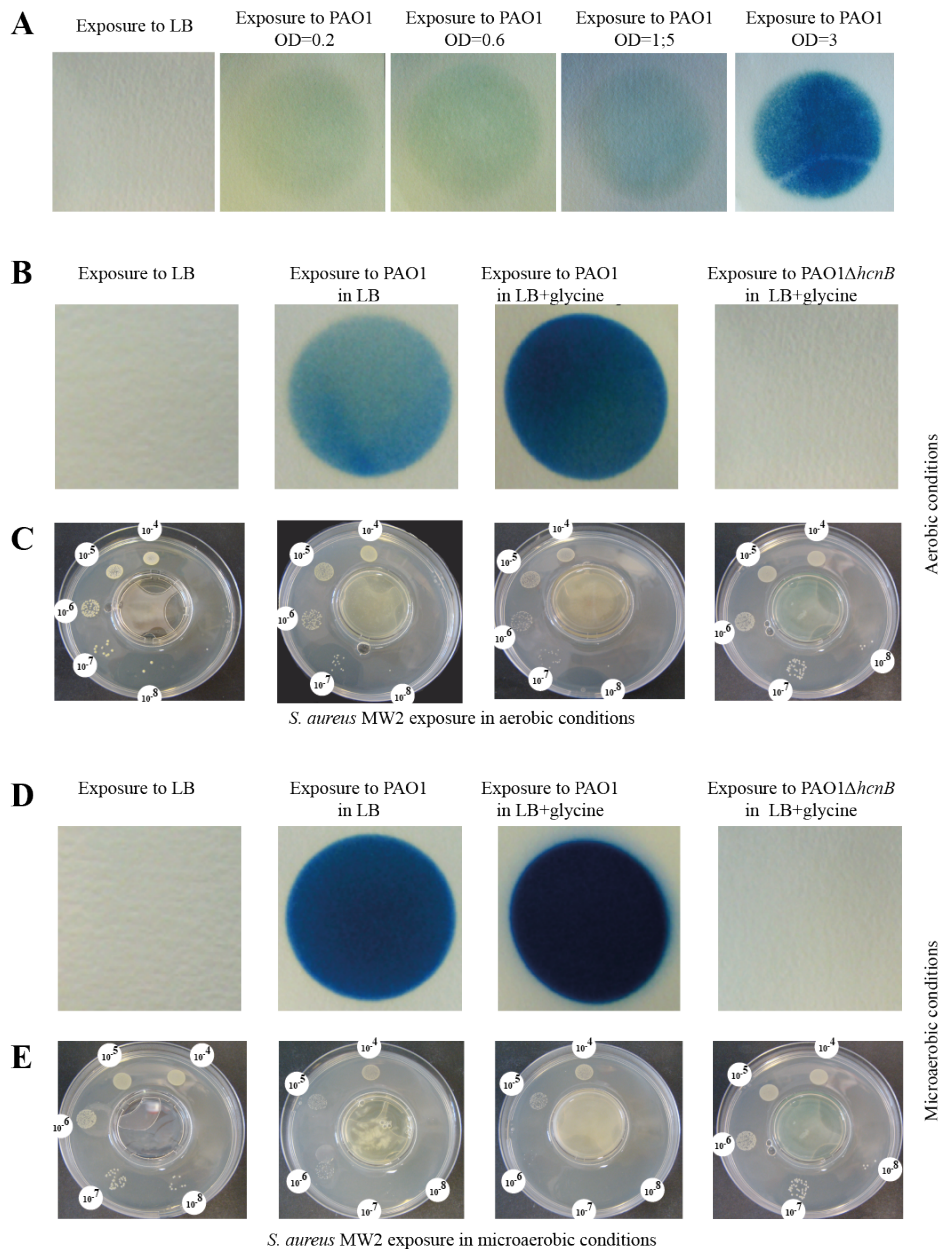

1  
2 **Figure 2. Microaerobia stimulates *P. aeruginosa* HCN production and increase *S. aureus***  
3 **sensitivity to HCN. A:** Semi-quantitative detection of volatile HCN showed an increased  
4 production of HCN by *P. aeruginosa* PAO1 at different stages of growth stages in LB medium.  
5 Each experiment was performed at least three times. **B, D:** Semi-quantitative detection of volatile  
6 HCN from *P. aeruginosa* WT and  $\Delta hcnB$ , in LB supplemented or not with 0.4% (w/v) glycine,  
7 after 24h incubation at 37°C in aerobic (B) or microaerobic (D) conditions. Each experiment was  
8 performed at least three times. **C,E:** Growth of serial dilution of *S. aureus* MW2 WT upon  
9 exposure to *P. aeruginosa* WT or  $\Delta hcnB$  cultures in LB supplemented or not with 0.4% (w/v)  
10 glycine, after 24h incubation at 37°C in aerobic (C) or microaerobic (E) conditions, using the 2-  
11 petri-dish assay described in Fig S1. Each experiment was performed at least three times.  
12



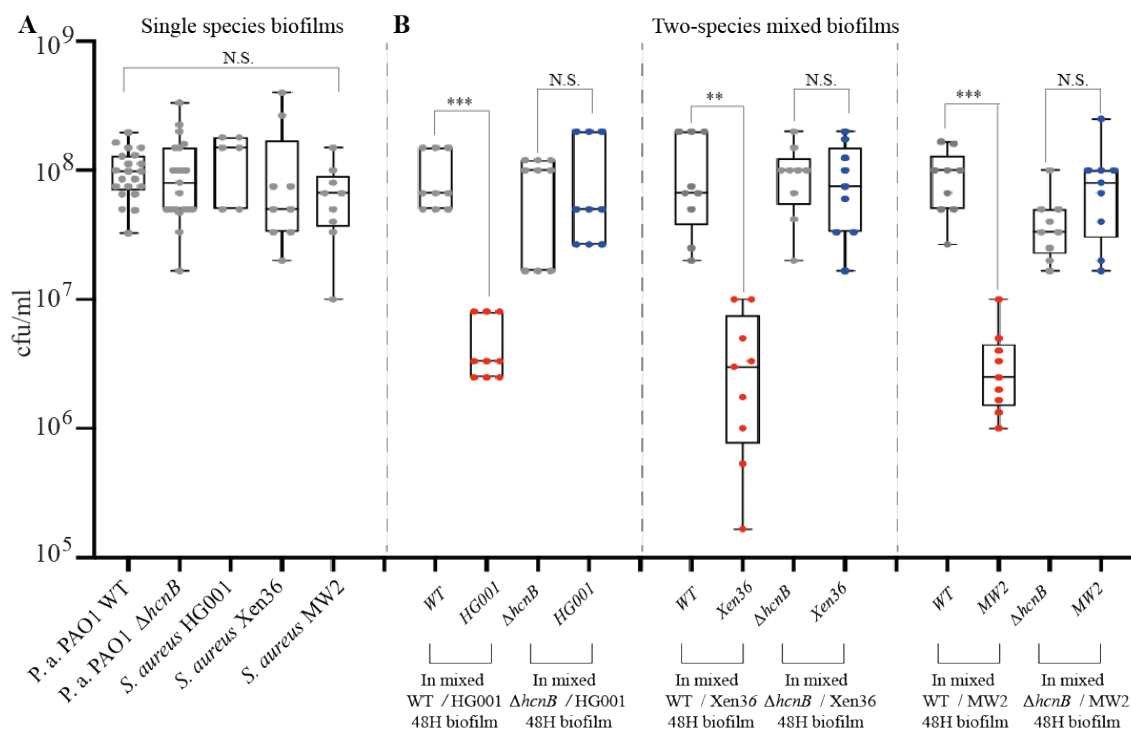

1  
2  
3 **Figure 3. Production of biogenic HCN impairs *S. aureus* growth in *in vitro* mixed biofilms.**

4 **A:** Number of CFU in indicated single species biofilms grown in continuous-flow  
5 microfermenters, in LB medium for 48h at 37°C. **B:** Number of CFU in indicated two-species  
6 mixed biofilms: each *S. aureus* strain was mixed with either WT *P. aeruginosa* PAO1 or its  $\Delta hcnB$   
7 mutant at a 1:1 ratio. The biofilms were grown in continuous flow microfermenters in LB medium  
8 for 48h at 37°C. Statistics correspond to two-tailed unpaired *t-test* with Welch correction.  
9 N.S.: not significant, \*\*  $p \leq 0.01$  and \*\*\*  $p \leq 0.001$ .

10

1

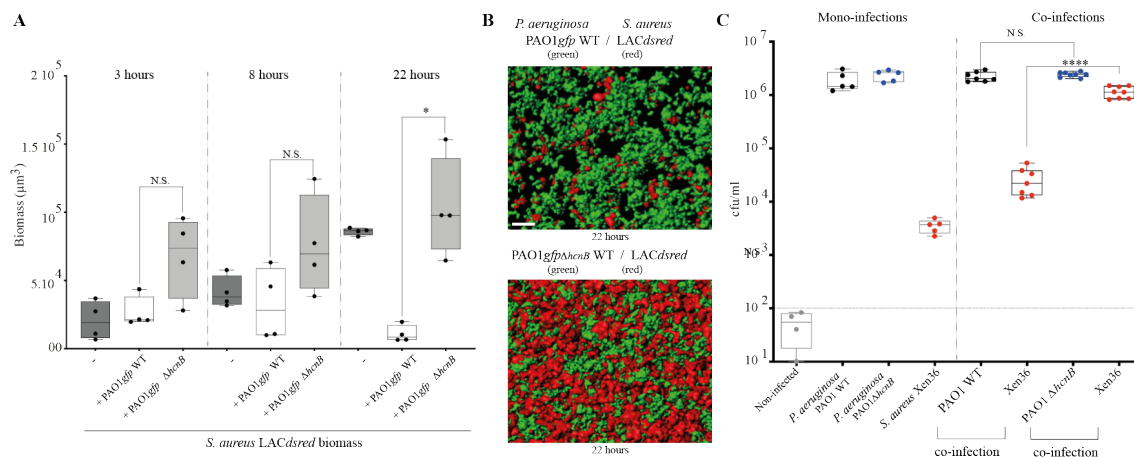

2

3

Figure 4. *P. aeruginosa* production of biogenic HCN inhibits *S. aureus* growth in in CF-

4

relevant conditions. **A:** Total biomass of *S. aureus* aggregates as monoculture or in co-infection

5

with PAO1 wildtype and/or *hcnB* mutant. Isolates were cultured in SCFM2 and imaged using

6

confocal microscopy at 3, 8 and 22 hours. Statistics correspond to two-tailed unpaired *t-test*

7

with Welch correction. N.S.: not significant, \*  $p \leq 0.05$ . **B:** Representative rendered confocal

8

micrograph of *S. aureus* and *P. aeruginosa* coinfection in SCFM2. Top – wild type *P. aeruginosa*

9

in green, *S. aureus* in red. Bottom – *P. aeruginosa* *hcnB* mutant in green, *S. aureus* in red. **C:** *In*

10

*in vivo* competition experiments in mice lungs. Mono and 1:2 mixed ratio co-inoculation of *S. aureus*

11

Xen36, *P. aeruginosa* PAO1 WT or  $\Delta$ *hcnB* mutant. Number of bacteria CFU was counted in the

12

lung homogenates of mice 24 h after infection. Non infected SOPF mice showed minimal lung

13

bacterial contamination with CFY<100 (horizontal dotted line). Statistics correspond to two-

14

tailed unpaired *t-test* with Welch correction. N.S.: not significant, \*\*\*  $p \leq 0.0001$ .

15

16

17

18
